1 **Human cytomegalovirus evades ZAP detection by suppressing CpG dinucleotides in**  
2 **the major immediate early genes.**

3

4 Yao-Tang Lin\*<sup>1</sup>, Stephen Chiweshe\*<sup>1</sup>, Dominique McCormick<sup>1</sup>, Anna Raper<sup>1</sup>, Arthur  
5 Wickenhagen<sup>4</sup>, Victor DeFillipis<sup>3</sup>, Eleanor Gaunt<sup>1</sup>, Peter Simmonds<sup>3</sup>, Sam J Wilson<sup>§4</sup>, Finn  
6 Grey<sup>§1</sup>

7

8 1. Division of Infection and Immunity, The Roslin Institute, University of Edinburgh, Easter  
9 Bush, Midlothian, UK.

10 2. Vaccine and Gene Therapy Institute, Oregon Health and Science University, Portland,  
11 Oregon, USA.

12 3. Peter Medawar Building for Pathogen Research, Nuffield Department of Medicine,  
13 University of Oxford, Oxford, United Kingdom.

14 4. MRC-University of Glasgow Centre for Virus Research, Glasgow, United Kingdom

15

16 \*Contributed equally to manuscript

17 §Co-corresponding authors

18

19 **Abstract**

20

21 The genomes of RNA and small DNA viruses of vertebrates display significant suppression of  
22 CpG dinucleotide frequencies. Artificially increasing dinucleotide frequencies results in  
23 substantial attenuation of virus replication, suggesting that these compositional changes may  
24 facilitate recognition of non-self RNA sequences. Recently, the interferon inducible protein  
25 ZAP, was identified as the host factor responsible for sensing CpG in viral RNA, through direct  
26 binding and possibly downstream targeting for degradation. Using an arrayed interferon  
27 stimulated gene expression library screen, we identified ZAPS, and its associated factor  
28 TRIM25, as direct inhibitors of human cytomegalovirus (HCMV) replication. Exogenous  
29 expression of ZAPS and TRIM25 significantly reduced virus replication while knockdown  
30 resulted in increased virus replication. HCMV displays a strikingly heterogeneous pattern of  
31 CpG representation with a specific suppression of CpGs within the IE1 major immediate early  
32 transcript which is absent in subsequently expressed genes. We demonstrated that  
33 suppression of CpG dinucleotides in the IE1 gene allows evasion of inhibitory effects of ZAP.  
34 During HCMV infection, expression of ZAP and TRIM25 are rapidly reduced, removing  
35 pressure to suppress dinucleotide frequencies in viral genes expressed after the immediate  
36 early genes, while acute virus replication and high levels of ZAP are mutually exclusive.  
37 Finally, we show that TRIM25 regulates alternative splicing between the ZAP short and long

38 isoforms during HCMV infection and interferon induction, with knockdown of TRIM25 resulting  
39 in decreased ZAPS and corresponding increased ZAPL expression. These results  
40 demonstrate for the first time that ZAP is a potent host restriction factor against large DNA  
41 viruses and that HCMV evades ZAP detection through suppression of CpG dinucleotides  
42 within the major immediate early transcripts. Furthermore, TRIM25 is required for efficient  
43 upregulation of the interferon inducible short isoform of ZAP through regulation of alternative  
44 splicing.

45

## 46 **Introduction**

47

48 Interferon (IFN) is a crucial first line of defence against viral infection and shapes the adaptive  
49 immune response by triggering release of cytokines and chemokines <sup>1,2</sup>. IFN expression is  
50 triggered by the recognition of pathogen-associated molecular patterns (PAMPs) <sup>1</sup>. These  
51 microbe-specific molecular structures are generally essential for the survival of the microbes,  
52 but fundamentally different from the host. Examples of PAMPs include peptidoglycans,  
53 liposaccharide (LPS) and pathogen specific nucleic acid motifs, such as double stranded RNA  
54 and unmethylated CpG sequences within DNA. Cells recognize PAMPs through pattern  
55 recognition receptors (PRRs) that trigger innate immune responses following recognition of  
56 the target. Families of PRRs include the membrane bound Toll-like receptors, C-type lectin  
57 receptors, the cytoplasmic NOD-like receptors and RIG-I like receptors <sup>3</sup>. Upon recognition of  
58 the specific PAMP during invasion by a foreign pathogen, PRRs trigger signaling cascades  
59 that lead to relocation of IRF3/IRF7 complexes and NF-κB into the nucleus, initiating  
60 expression of type I IFN. In turn, activation of the IFN receptor leads to up-regulation of  
61 hundreds of IFN stimulated genes (ISGs) that, together, establish an antiviral cellular  
62 environment <sup>4</sup>.

63

64 Dinucleotide representation in RNA sequences have been investigated as a potential PAMP  
65 <sup>5-9</sup>. Plant and vertebrate genomes show significantly lower CpG and TpA frequencies than  
66 would be expected given their overall base composition. Lower CpG frequencies are thought  
67 to have arisen through deamination of methylated cytosines in nuclear DNA, resulting in CpG  
68 sequences mutating to TpG <sup>10</sup>. RNA and small DNA viruses of vertebrates have evolved a  
69 similar pattern of suppressed CpG dinucleotides and artificially increasing dinucleotide  
70 frequencies within their viral genomes through synonymous mutations results in considerable  
71 attenuation of virus replication <sup>6-9</sup>.

72

73 A recent study identified the short form of the zinc-finger antiviral protein (ZAP) and its  
74 associated factor TRIM25 as responsible for recognition of high CpG frequencies in viral RNA

75 <sup>11</sup>. Mammalian ZAP is expressed in two major isoforms, ZAPS (short) and ZAPL (long) which  
76 are generated by differential splicing, with ZAPL encoding an additional catalytically inactive  
77 poly (ADP-ribose) polymerase (PARP) domain <sup>12</sup>. ZAP had previously been identified as a  
78 host antiviral factor and is capable of binding to viral RNA through a pocket created by the  
79 second of four zinc fingers within the RNA binding domain <sup>13-15</sup>. TRIM25 is an E3 ubiquitin  
80 ligase and member of the tripartite motif (TRIM) family, many of which have been associated  
81 with antiviral functions <sup>16,17</sup>. TRIM25 is required for ZAPS antiviral activity, although the precise  
82 mechanism by which TRIM25 contributes to ZAPS antiviral activity is not fully understood <sup>18,19</sup>.  
83 A focused siRNA screen against human ISGs showed that knockdown of ZAP or TRIM25  
84 rescued the replication of a defective HIV construct with artificially raised CpG levels <sup>11</sup>.  
85 Immunoprecipitation of ZAPS and sequencing of associated RNA demonstrated that ZAPS  
86 directly interacts with high CpG regions of HIV RNA. Knockdown of ZAPS has also been  
87 shown to rescue echovirus 7 virus that was attenuated through artificially increased CpG  
88 levels <sup>20</sup>.

89  
90 While CpG dinucleotide levels have clearly been shown to impact the fitness of RNA and small  
91 DNA viruses <sup>6-9</sup>, their role in host recognition of large DNA viruses is less clear.

92  
93 HCMV is a highly prevalent herpesvirus, persistently infecting between 30% and 100% of the  
94 human population, correlating with socio-economic status<sup>21</sup>. HCMV remains an important  
95 clinical pathogen accounting for more than 60% of complications associated with solid organ  
96 transplant patients <sup>22-24</sup>. It is also the leading cause of infectious congenital birth defects  
97 resulting from spread of the virus to neonates and has been linked to chronic inflammation  
98 and immune aging <sup>25-27</sup>. However, infection is normally asymptomatic due to effective control  
99 of virus replication by various arms of the immune system, including the interferon (IFN)  
100 response <sup>2</sup>. Although HCMV has evolved multiple mechanisms to subvert and inhibit the  
101 antiviral effects of IFNs, current evidence indicates they play a vital role in controlling  
102 replication and pathogenesis. Individuals with mutations in key IFN signalling genes are  
103 lethally susceptible to HCMV infections and recombinant IFN has been successfully used in  
104 treating congenital HCMV and HCMV infection in AIDS patients. Furthermore, murine CMV is  
105 more pathogenic in IFN knock-out mice than wildtype mice <sup>2</sup>.

106  
107 Infection with HCMV results in a robust IFN response. While viral attachment has been  
108 reported to be sufficient to trigger the IFN response, detection of HCMV is likely to occur  
109 through a multifactorial process <sup>28</sup>. The cellular sensors cGAS, IFI16 and ZBP1 have been  
110 shown to play a role in detection of the HCMV genome, while Toll-like receptors (TLRs) are

111 also thought to be important<sup>29-32</sup>. Detection leads to activation of signalling proteins, including  
112 IRF3, IRF7 and NFKB, resulting in up regulation of hundreds of ISGs<sup>33-35</sup>. Which of these  
113 ISGs are directly responsible for inhibiting HCMV is poorly understood. While the initial ISG  
114 response is robust, it is quickly shut down by the virus, resulting in a characteristic expression  
115 profile of rapid induction at early time points (up to 24 hours post infection) followed by efficient  
116 suppression of IFN regulated gene expression. This shut down is in part due to the expression  
117 of the viral immediate early genes IE1 and IE2, both of which have been shown to curtail the  
118 initial IFN response to HCMV<sup>33,36,37</sup>.

119

120 To further dissect the role of the IFN response during HCMV infection, we used an arrayed  
121 lentivirus expression library to identify ISGs that inhibit HCMV. We show that ZAP and TRIM25  
122 can potently inhibit HCMV replication and that HCMV has evolved to suppress CpG  
123 dinucleotides in the major immediate early transcript IE1 to evade detection by ZAP.

124

## 125 **Results**

126

127 *Arrayed ISG expression screening identified ZAPS and TRIM25 as direct inhibitors of HCMV*  
128 *replication*

129

130 Systematic dissection of the 'antiviral state' using arrayed ISG expression libraries is an  
131 effective method for identifying key components of the IFN response<sup>38-42</sup>. To identify ISGs  
132 that inhibit HCMV, human primary fibroblast cells were transduced with 421 individual ISG-  
133 encoding lentiviral vectors (or control empty vectors), in a 96-well plate format. Two days post  
134 transduction, cells were infected at a multiplicity of infection (MOI) of three with TB40/E-GFP,  
135 a BAC derived low passage HCMV strain containing an SV40 promoter driven eGFP cassette  
136 inserted between the viral TRS1 and US34 genes<sup>43</sup>. Levels of GFP were monitored over a  
137 seven-day period using a plate cytometer (Figure 1A). At seven days post infection,  
138 supernatant was transferred to fresh untransduced fibroblast cells to determine virus  
139 production levels. GFP levels were compared to the average signal for the respective plate.  
140 While this approach can identify which ISGs have the capacity to inhibit HCMV replication,  
141 many of the hits identified may inhibit virus replication by triggering IFN signalling through  
142 overexpression alone, independently of HCMV infection. To identify ISGs more likely to  
143 directly inhibit HCMV, as opposed to activation of IFN signalling, we performed a parallel  
144 screen using IRF3 KO fibroblast cells generated by CRISPR/Cas9 editing<sup>44</sup>. Percentage GFP  
145 levels were determined by comparing each ISG to the average GFP signal from each 96 well  
146 plate to control for inter-plate variations. Figure 1B compares the percentage virus production  
147 levels based on GFP signal for each ISG transduced well between wild type fibroblast cells

148 and IRF3 KO cells. As virus production is the most relevant measurement for the full virus  
149 replication cycle, our studies focused on the results from this screen (The data from the  
150 primary replication screen is shown in supplemental figure 1A-C and supplemental table 1).  
151 The blue box highlights ISGs that reduced HCMV virus production by more than 2-fold in  
152 unmodified fibroblast cells, but were not substantially inhibitory in IRF3 KO fibroblast cells.  
153 These IRF3-dependant inhibitory ISGs are highlighted in figure 1C and include cGAS, TLR3,  
154 MyD88 and DDX60, all known to act through IRF3 signalling. Additional ISGs, not previously  
155 known to act through IRF3, showed a similar pattern. The green box in figure 1B highlights  
156 ISGs that inhibit HCMV virus production in both wild type fibroblast cells and IRF3 KO cells,  
157 with figure 1D showing the relative virus production levels in each cell type. These IRF3-  
158 independent ISGs include those that signal through IRF3 independent pathways (eg IRF7) or  
159 are known to inhibit HCMV directly (IDO and RIPK2) validating the screening approach <sup>45,46</sup>.  
160 Interestingly, both ZAPS and TRIM25 inhibited HCMV virus production in an IRF3 independent  
161 manner, indicating they may play a role in directly inhibiting the virus. ZAPS and TRIM25 have  
162 recently been identified as host factors responsible for inhibiting HIV-1, Echo-7 and influenza  
163 virus constructs with synthetically increased CpG levels <sup>9,11,20</sup>. The two co-factors have also  
164 been reported to have antiviral activity against multiple viruses <sup>47-51</sup>. Based on this, we decided  
165 to further characterise the role of ZAPS and TRIM25 in the inhibition of HCMV replication.

166  
167 To independently confirm the results of the screen, wild type fibroblast cells and IRF3 KO cells  
168 were transduced with independent lentiviral vector stocks expressing ZAPS, TRIM25, cGAS  
169 or an empty vector control, and infected with TB40/E-GFP (MOI of 3). GFP fluorescence levels  
170 were monitored for seven days (Figure 2A and B). As expected, efficient cGAS inhibition was  
171 largely dependent on IRF3 expression whereas virus replication was potently inhibited by  
172 ZAPS or TRIM25 in wild type and IRF3 KO cells. This confirmed our observations from the  
173 initial screen and implicated ZAPS and TRIM25 as direct inhibitors of HCMV virus replication.  
174 To confirm GFP reporter levels expressed by the virus accurately reflected virus replication,  
175 plaque assays were performed in wild type fibroblast cells transduced with lentivirus  
176 expressing either ZAPS or TRIM25 and compared to cells transduced with an empty control  
177 lentivirus. The results confirm that expression of ZAPS and TRIM25 significantly reduced viral  
178 replication (Figure 2C). To determine the effect of knockdown of ZAP and TRIM25 on HCMV  
179 replication, fibroblast cells were transfected with siRNAs targeting ZAP, TRIM25 or a negative  
180 control siRNA. Western blot analysis demonstrated efficient knockdown of ZAP and TRIM25  
181 (Supplemental figure 2). Importantly, siRNA knockdown of ZAP or TRIM25 significantly  
182 increased HCMV replication, with titres increased by as much as 100-fold following  
183 knockdown of ZAP (Figure 2D and E). Thus, endogenous ZAP can inhibit HCMV and the  
184 rescue of HCMV replication presented here is likely an underestimate, as siRNAs do not

185 remove all the endogenous protein and ZAPS expression would be substantially higher in IFN-  
186 stimulated cells.

187

188 *Distinct patterns of dinucleotide frequencies in subfamilies of herpesvirus genomes*

189

190 Recent studies have identified ZAPS and TRIM25 as host factors involved in targeting and  
191 inhibiting RNA with high CpG dinucleotide frequencies<sup>9,11,20</sup>. As such they convey evolutionary  
192 pressure on RNA and small DNA viruses, resulting in suppression of CpG dinucleotide  
193 sequences within their genomes. However, the effects of host recognition of high CpG  
194 frequencies on larger DNA viruses, such as herpesviruses, has not been reported. Analysis  
195 of herpesvirus genomes suggests distinct patterns of CpG dinucleotide composition  
196 associated with the three subfamilies (alpha, beta and gamma)<sup>52</sup>. While alpha herpesviruses  
197 such as HSV-1 show no suppression of CpG dinucleotides within their genomes  
198 (Supplemental figure 3), substantial CpG suppression is seen throughout gamma herpesvirus  
199 genomes, such as Epstein-Barr virus (EBV) (Supplemental Figure 4). Beta herpesviruses  
200 demonstrate localised suppression of CpG sequences within the major immediate early  
201 genes. These genes are the first viral transcripts to be expressed following infection and they  
202 are critical for driving lytic replication of the virus and are thought to play a pivotal role during  
203 the establishment, maintenance and reactivation from latency. Analysis of sixteen beta  
204 herpesvirus genomes demonstrates extensive evolutionary conservation of suppressed CpG  
205 dinucleotide sequences specifically associated with immediate early transcripts (Figure 3). In  
206 contrast, there is no such pattern for the complementary GpC dinucleotide control,  
207 (Supplemental figure 5). These results indicate that the earliest beta herpesvirus transcripts  
208 have been selected for reduced CpG content, whereas these constraints do not extend to viral  
209 transcripts expressed at later times during infection.

210

211 *IE1 expression is not affected by ZAP.*

212

213 To determine the effect of ZAP expression on viral genes, the open reading frames of IE1, IE2  
214 and pp52, an early gene with a high CpG dinucleotide frequency, were cloned into expression  
215 vectors. Cellular GAPDH tagged with T7, that has a low CpG frequency in line with mammalian  
216 genomes, was cloned into the same expression vector to generate a negative control. These  
217 plasmids were co-transfected with a plasmid expressing ZAPS. Expression of ZAPS had little  
218 effect on T7-GAPDH (Figure 4A). Similarly, while expression of ZAPS profoundly reduced  
219 pp52 expression by approximately 80% (Figure 4B) and IE2 expression to a lesser extent,  
220 ZAPS had no effect on IE1 expression. These results are in line with what would be predicted  
221 based on the CpG dinucleotide frequencies and confirm that suppression of CpG levels in IE1

222 allow this gene to evade the inhibitory effects of ZAPS. Interestingly, overexpression of ZAPL  
223 shows the same effects as ZAPS, suggesting that the longer isoform has the same ability to  
224 reduce expression of transcripts with high frequencies of CpG sequences (Figure 4C and D).

225

226 *IE1 expression is not affected by ZAP during HCMV infection*

227

228 As previously shown, overexpression of ZAPS profoundly inhibited virus replication (Figure  
229 2A-C), and overexpression of ZAPS and ZAPL resulted in the reduced expression of HCMV  
230 viral proteins encoded by genes with high CpG frequencies following transient transfection  
231 experiments in HEK293T cells (Figure 4). To determine the effect of ZAPS on viral gene  
232 expression, western blot analysis was performed on total protein samples from wild type  
233 fibroblast cells transduced with lentivirus expressing ZAPS and infected two days later with  
234 TB40E-GFP (MOI of 3) (Figure 5). As is the case with all herpesviruses, viral gene expression  
235 occurs in a controlled temporal cascade with immediate early (IE) early (E) and late (L) gene  
236 expression occurring in a sequential fashion. Total protein was harvested at the indicated time  
237 points and levels of IE (IE1 and IE2), E (pp52) and L (pp28) proteins measured. Strikingly,  
238 ZAPS had little to no effect on IE1 expression levels throughout the time course, but  
239 substantially reduced IE2 levels and subsequent E and L viral gene expression. These results  
240 indicate that in the context of viral infection, IE1 expression is unaffected by ZAPS, likely due  
241 to highly suppressed CpG abundance in this transcript, enabling evasion of ZAPS.

242

243 *Endogenous ZAP is induced during HCMV infection but expression is mutually exclusive to*  
244 *acute virus progression.*

245

246 As overexpression of ZAP profoundly attenuates HCMV replication, we next determined the  
247 effects of endogenous ZAP during virus replication. Western blot analysis was performed on  
248 total protein lysates harvested from wild type fibroblast cells infected with TB40/E-GFP (MOI  
249 of 3), which results in close to 100% infection based on GFP expression. ZAPS expression  
250 was robustly induced 24 hours post infection and although levels decreased over time, the  
251 levels of endogenous ZAPS remained higher than in uninfected cells throughout the course  
252 of the infection (Figure 6A). ZAPL expression was not induced but also decreased over the  
253 course of the infection.

254

255 To determine whether ZAP expression levels correlated with HCMV infection at the individual  
256 cell level, we employed confocal microscopy. Cells were co-stained for ZAP and viral IE1 or  
257 IE2 expression in wild type fibroblast cells following infection with AD169, a laboratory adapted  
258 strain of HCMV. This strain was used instead of TB40/E-GFP as it does not express GFP,

259 which would interfere with the fluorescent signal. Uniform, low levels of ZAP expression can  
260 be seen throughout uninfected cells (Figure 6B). While almost all cells are IE1 positive  
261 following infection with HCMV at an MOI of 3, a mixed population of cells demonstrate high  
262 and low expression of ZAP. Multiple IE1 positive cells were observed with high levels of ZAP  
263 expression, further demonstrating that IE1 expression is not affected by high ZAP levels. In  
264 contrast IE2 expression and high levels of ZAP were mutually exclusive, suggesting  
265 progression of virus replication is blocked in cells expressing high levels of ZAP. This is  
266 confirmed by quantification of ZAP expression levels in IE1 and IE2 expressing cells (Figure  
267 6C).

268  
269 The existence of a mixed population of cells expressing high and low levels of ZAP, correlating  
270 with progression of virus replication is further supported by sorting of infected cell populations.  
271 Following infection with TB40/E-GFP at an MOI of 3, cells were sorted into high and low GFP  
272 expressing populations, 24 hours post infection, then reseeded and total protein levels  
273 determined at the indicated time points (Figure 7). Western blot analysis indicates that the low  
274 GFP expressing population correlated with high levels of ZAPS expression and a failure in  
275 progression of virus replication (although IE1 protein expression could still be detected). In  
276 contrast, high GFP expressing populations corresponded with lower ZAPS expression and  
277 high levels of viral protein production, consistent with efficient virus replication.

278  
279 These data suggest that high levels of ZAP expression are mutually exclusive with the  
280 successful progression of virus replication. In contrast, IE1 expression is unaffected,  
281 consistent with suppressed CpG content facilitating evasion of ZAP detection.

282  
283 *TRIM25 is required for efficient ZAPS induction following HCMV infection or IFN treatment*

284  
285 TRIM25 is recognised as a key functional partner of ZAPS antiviral activity. However, the  
286 mechanism by which TRIM25 augments ZAPS antiviral activity is unclear. It has been shown  
287 that TRIM25 ubiquitinates ZAPS and itself through its E3 ubiquitin ligase function<sup>18,19</sup>.  
288 However, ZAPS antiviral activity does not seem to be dependent on TRIM25 ubiquitination. In  
289 this study, we show that like ZAPS, TRIM25 is a potent, IRF3 independent inhibitor of HCMV  
290 replication (Figure 1 and 2).

291  
292 Strikingly, in addition to increasing viral protein expression, siRNA knockdown of TRIM25  
293 results in a substantial reduction in ZAPS expression following infection with HCMV and a  
294 corresponding increase in ZAPL expression (Figure 8A). As previously described, ZAPS and  
295 ZAPL are expressed from the same primary transcript through differential splicing and only



296 ZAPS expression is considered to be stimulated by IFN treatment, indicating that differential  
297 splicing is involved in the regulation of ZAPS and ZAPL levels (Figure 8B).

298

299 To determine whether the failure in ZAPS induction following TRIM25 knockdown was at the  
300 RNA or protein level, ZAPS and ZAPL RNA levels were determined by RT-qPCR. Fibroblast  
301 cells were transfected with a control siRNA or siRNA targeting TRIM25 and infected with  
302 TB40/E-GFP. Total RNA was harvested 24 HPI and primers specific to ZAPS, ZAPL or to a  
303 shared region of ZAP were used to measure transcript levels. While total levels of ZAP RNA  
304 were unaffected by TRIM25 knockdown, levels of ZAPS were significantly reduced with a  
305 corresponding increase in ZAPL levels (Figure 8C). This effect is not specific to HCMV  
306 infection as the same observation can be seen in uninfected fibroblast cells and cells treated  
307 with IFN (Figure 8D and E). Furthermore, ZAP induction, as well as induction of other well  
308 characterised ISGs, was not reduced by TRIM25 knockdown ruling out a general failure in IFN  
309 induction (Figure 8F and Supplemental figure 6). The results clearly show that efficient IFN  
310 induced gene expression occurs despite TRIM25 knockdown, suggesting the effect is specific  
311 to differential splicing of ZAP. Although these results do not rule out the possibility that TRIM25  
312 regulates the antiviral function of ZAPS through direct protein-protein interaction, they explain  
313 how TRIM25 contributes to the activity of ZAPS by regulation of ZAPS induction through  
314 differential splicing.

315

## 316 **Discussion**

317

318 Associated pathologies and therapeutic potential of HCMV is dependent on the host immune  
319 response against the virus. As IFNs shape the innate and adaptive responses to the virus,  
320 understanding how the IFN response is regulated during HCMV infection and how the virus  
321 subverts this response could have important implications for our understanding of diseases  
322 associated with the virus as well as for the rational design of vaccines and cancer therapeutics.

323

324 Although it is clear that the IFN response is important during HCMV infection, which of the  
325 hundreds of induced ISGs play a critical role is less clear. Here we present a systematic  
326 analysis, determining the effect of over 400 individual ISGs on HCMV replication. By  
327 combining screens in wild type and IRF3 knockout cells we were able to define specific  
328 subsets of ISGs that were IRF3 independent and therefore more likely to represent direct  
329 inhibitors of virus replication. These included IDO and RIPK2, which have previously been  
330 identified as important antiviral factors during HCMV infection<sup>45,46</sup>. In addition, multiple novel  
331 inhibitors were identified, including ZAP and TRIM25, which have previously been shown to  
332 act in a coordinated antiviral fashion<sup>18,19</sup>.

333  
334  
335  
336  
337  
338  
339  
340  
341  
342  
343  
344  
345  
346  
347  
348  
349  
350  
351  
352  
353  
354  
355  
356  
357  
358  
359  
360  
361  
362  
363  
364  
365  
366  
367  
368  
369

ZAP was originally identified as an antiviral protein by screening a rat cDNA library for factors that inhibited the replication of Moloney murine leukemia retrovirus<sup>13</sup>. Subsequent studies have demonstrated that ZAP has antiviral activity against a range of RNA viruses, including HIV, filoviruses, flaviviruses, coxsackievirus B3, influenza A virus, Newcastle disease virus and Hepatitis B virus, a partially double stranded DNA virus<sup>48-51,53-55</sup>. Initial studies indicated that ZAP antiviral activity was based on direct binding to viral RNA and degradation through recruitment of exosome complex components and inhibition of translation<sup>13,14,56</sup>. Further studies have suggested that ZAPS interacts with RIG-I to stimulate IFN expression through IRF3 signalling<sup>54</sup>. This is consistent with the partial rescue of ZAPS inhibition of HCMV in IRF3 KO cells observed in this study, suggesting a dual functionality of ZAPS in HCMV antiviral activity, acting both as a pathogen sensing protein and as a direct antiviral factor.

Until recently, the sequence or sequence characteristics that defined ZAPS RNA binding specificity were not known. However, a study using a focused siRNA screen identified ZAPS and TRIM25 as host factors responsible for inhibition of HIV-1 constructs with artificially raised CpG dinucleotide frequencies and it was shown that ZAPS specifically binds to RNA sequences at CpG dinucleotide motifs<sup>13</sup>. The molecular mechanism for this binding has now been established through X-ray crystallography of the ZAP RNA binding domain complexed with a target CpG RNA, which demonstrates the second of four zinc fingers creates a highly basic patch that is required for specific binding of CpG dinucleotides<sup>57</sup>.

It had previously been suggested that mammalian RNA and small DNA viruses suppress CpG dinucleotides to mimic the composition of their host genomic make up, thereby avoiding recognition as foreign nucleic acid<sup>6-8</sup>. While CpG bias has previously been reported for herpesviruses, this bias was attributed to potential methylation status rather than evasion of a host antiviral response<sup>52</sup>. The pattern of CpG dinucleotide frequencies in herpesviruses is so distinctive that, with few exceptions, viruses can be attributed to the main three subfamilies based on the CpG dinucleotide frequency patterns within open reading frame (Supplemental figures 1-3). The majority of alpha-herpesviruses demonstrate little or no CpG suppression, while gamma-herpesviruses demonstrate substantial suppression across the genome. Beta-herpesviruses display the most striking pattern of all, with suppression of CpG dinucleotides linked to temporal gene expression and specifically restricted to the immediate early genes. It is intriguing to speculate that the genomes of these large DNA viruses may have been so dramatically moulded by a single host antiviral mechanism, although other factors may also play a role.

370 The fact that CpG dinucleotide patterns are so uniform across the virus sub-families also  
371 suggests a central underlying biological relevance. For example, alpha-herpesviruses are  
372 mainly associated with latent infections in neuronal cells where the interferon response may  
373 be limited due to immune privilege and constitutive expression levels of ZAP are low <sup>20</sup>,  
374 whereas beta-herpesviruses and gamma-herpesviruses are mainly associated with latency in  
375 haematopoietic cells and are therefore under greater pressure to evade host cell IFN  
376 responses <sup>58</sup>. Alternatively, alpha-herpesviruses may have evolved a robust mechanism that  
377 directly counteracts ZAP antiviral activity, making it unnecessary to repress CpG  
378 dinucleotides. This is supported by a previous study that showed HSV-1 was able to replicate  
379 to wild type levels despite expression of a ZAP construct, although the construct expressed a  
380 truncated version of rat ZAP, rather than full length human ZAP <sup>47</sup>. Further studies will be  
381 required to determine whether the CpG dinucleotide frequency in herpesvirus sub-families is  
382 directly related to ZAP expression and why these patterns are so distinctively associated with  
383 the specific virus sub-families.

384

385 Multiple studies have linked TRIM25 with efficient ZAP antiviral activity, and, like ZAPS, our  
386 screen identified TRIM25 as an IRF3 independent inhibitor of HCMV. TRIM25 is an E3 ligase  
387 that catalyses ubiquitylation and ISGylation of target proteins <sup>16,17</sup>. TRIM25 contains a zinc ring  
388 finger, B-box, coiled coil and PRY/SPRY domain. Both Takata *et al* and Li *et al* demonstrated  
389 that TRIM25 is required for ZAP antiviral activity through siRNA screens <sup>11,18</sup>, whereas Zheng  
390 *et al* identified TRIM25 as a ZAP interacting factor through affinity purification <sup>19</sup>. These studies  
391 demonstrated that TRIM25 interacts directly with ZAP through the PRY/SPRY domain and  
392 ubiquitinates ZAP and itself. While ubiquitination requires binding of ZAP and TRIM25 to RNA  
393 it does not seem to be directly necessary for ZAP antiviral activity <sup>18,19,59</sup>. TRIM25 also inhibits  
394 influenza A virus in a ZAP independent manner through direct binding to the viral  
395 ribonucleoprotein complex <sup>60</sup>. We show that TRIM25 expression potently inhibits HCMV  
396 replication although further studies will be required to determine whether this occurs in a ZAP  
397 dependent or independent manner.

398

399 In addition, our studies suggest that TRIM25 regulates the alternative splicing of ZAP. A recent  
400 study demonstrated that alternative splicing of the ZAP primary transcript leads to at least four  
401 different isoforms; ZAPS, ZAPM, ZAPL and ZAPXL <sup>61</sup>, although our study focused on the  
402 major isoforms ZAPS and ZAPL. ZAPL contains a catalytically inactive PARP-like domain at  
403 the C terminus, that is missing from ZAPS. Both ZAPS and ZAPL have been reported to have  
404 antiviral activity, although ZAPS was identified as the host factor responsible for CpG  
405 recognition <sup>13</sup>. In our study we found that both ZAPS and ZAPL could target high CpG  
406 transcripts. Following virus infection or IFN treatment ZAP is induced, however differential

407 splicing results in higher levels of induction of ZAPS compared to ZAPL. Following HCMV  
408 infection, TRIM25 knockdown resulted in significantly lower levels of ZAPS protein and RNA  
409 levels with a corresponding increase in ZAPL levels indicating a TRIM25 dependant change  
410 in differential splicing of ZAP. Regulation of ZAP splicing by TRIM25 occurs in uninfected cells  
411 and IFN stimulated cells, indicating it is not specific to HCMV but rather a fundamental aspect  
412 of ZAP regulation. It is unclear at this point whether TRIM25 plays a direct role in splicing of  
413 ZAP or whether the regulation occurs through an intermediate signalling pathway. TRIM25  
414 has been shown to directly bind RNA through its PRY/SPRY domain<sup>59</sup>, and plays a role in the  
415 maturation of the microRNA let-7<sup>62</sup>, suggesting a more direct role in processing ZAP RNA is  
416 possible. However further studies will be required to dissect its precise role<sup>59</sup>.

417

418 Increasing the CpG levels within the IE1 coding region could be a viable approach for  
419 generating safer live attenuated vaccines with reduced risk of reversion as the mutations could  
420 be spread across the entire length of the IE1 gene. Increasing the CpG levels in IE1 could  
421 also increase the immunogenicity of the virus by triggering more robust IFN responses, which  
422 could improve HCMV vaccines as well as the use of HCMV as a vaccine vector and as a  
423 therapeutic cancer vaccine. However, construction of such viruses may be challenging due to  
424 the central role the major immediate early genes play in acute replication of the virus and the  
425 potential for introduced mutations to disrupt the complex splicing events or regulatory regions  
426 embedded within the coding region of IE1. Future experiments will be required to determine  
427 the potential application of such viruses.

428

## 429 **Materials and Methods**

430

### 431 **Cell culture and viral infection**

432 Normal Human Dermal Fibroblasts (NHDF; Gibco) and IRF3<sup>-/-</sup> cells were maintained in  
433 Dulbecco's modified high glucose media (DMEM; Sigma) supplemented with 10% fetal bovine  
434 serum (FBS; Gibco) and 1% penicillin-streptomycin (Invitrogen). IRF3<sup>-/-</sup> cells were provided  
435 by Victor DeFillipis. A low passage HCMV strain TB40E-GFP<sup>43</sup>, which expresses GFP from  
436 an SV40 promoter was used for arrayed ISG expression library screening, western blot  
437 analysis, Real-Time PCR, and flow cytometry analysis. Laboratory adapted HCMV strain  
438 AD169 was used for immunofluorescence experiments.

439

### 440 **Arrayed ISG lentivirus expression library screening**

441 The human lentivirus expression library has been previously described<sup>42</sup>. In brief the library  
442 encodes 420 human ISG genes on the pSCRPSY backbone (KT368137.1). Normal human

443 dermal fibroblast cells and IRF3<sup>-/-</sup> cells were seeded in 96-well plates a day before  
444 transduction. Next day, cells reached 90-95% confluency and were transduced with the ISG  
445 library. Transduced cells were incubated for 48 hours and then infected with GFP expressing  
446 TB40E virus at an MOI of three. GFP intensity was monitored every 24 hours with Synergy  
447 HT microplate reader (Biotek).

448

#### 449 **siRNA transfection**

450 NHDFs were seeded in 6-well plates a day before siRNA transfection. Next day, cells reached  
451 90-95% confluency and were transfected with siRNA twice (4 hours apart between first and  
452 second transfections) using Lipofectamine RNAiMAX (Invitrogen) according to the  
453 manufacturer's protocol. siRNAs used in this article are Human ON-TARGETplus siRNAs  
454 against TRIM25 and ZC3HAV1 (4 individual siRNAs per gene; Dharmacon). Transfected  
455 NHDFs were incubated for 48 hours and then infected with GFP expressing TB40E virus at  
456 an MOI of three.

457

#### 458 **Western blot analysis**

459 Cells were lysed with RIPA buffer (0.1% SDS, 1% Triton X-100, 1% deoxycholate, 5 mM  
460 EDTA, 150 mM NaCl, and 10 mM Tris at pH 7.2) containing protease inhibitor cocktail (Roche).  
461 Ten micrograms of the total lysate was separated in 10% SDS-polyacrylamide gels and  
462 transferred to PVDF membranes (Millipore). Primary antibodies used in this paper are mouse  
463 anti-CMV IE1/2 monoclonal antibody (MAB8131, Millipore), mouse anti-CMV pp52  
464 monoclonal antibody (CH16, Santa Cruz Biotechnology), mouse anti-CMV pp28 monoclonal  
465 antibody (CH19, Santa Cruz Biotechnology), rabbit anti-ZAP polyclonal antibody (PA5-31650,  
466 Invitrogen), mouse anti-TRIM25 monoclonal antibody (BD Biosciences), rabbit anti-T7 tag  
467 monoclonal antibody (D9E1X, Cell Signaling Technology), mouse anti-alpha tubulin  
468 monoclonal antibody (DM1A, Abcam) and mouse anti-β-Actin monoclonal antibody (Abcam).  
469 Blots were probed with primary antibody (1:500-1:5000) diluted in 5% dehydrated milk in Tris  
470 Buffered Saline (TBS) and subsequently the HRP-conjugated secondary antibodies (Pierce)  
471 at 1:5000. Blots were washed in TBS three times, incubated with chemiluminescent substrate  
472 (SuperSignal West Pico; Thermo Scientific) according to the manufacturer's protocol, and  
473 exposed in G:Box (Syngene) for visualization of bands.

474

#### 475 **Vector Construction and transfection**

476 The expression vectors used in the article were made by cloning the coding sequences of  
477 UL123 (IE1, TB40E), UL122 (IE2, TB40E), UL44 (pp52, TB40E), Human GAPDH with double  
478 T7-tag at the N-terminus, into the pcDNA3.1 vector. The ZAP(L) and ZAP(S) expression

479 vectors were made by cloning the coding sequences of ZAP(L) and ZAP(S) into the pcDEF3.1  
480 vector derived from pcDNA3.1 with the CMV promoter replaced by the EF1alpha promoter.

481

#### 482 **Immunofluorescence**

483 Laboratory adapted HCMV strain AD169 infected cells were fixed in 4%  
484 paraformaldehyde solution for 20 minutes and then permeabilized in Methanol:Acetone  
485 solution (1:1) at -20°C for 7 minutes, and then blocked with 5% human serum in PBS for 30  
486 minutes. Primary and secondary antibodies were diluted with 5% human serum in PBS. Cells  
487 were washed with PBS after primary and after secondary antibody incubations. Primary  
488 antibodies used in this paper are mouse anti-CMV IE2 monoclonal antibody (12E2, Santa  
489 Cruz Biotechnology), mouse anti-CMV IE1/2 monoclonal antibody (MAB8131, Millipore), and  
490 rabbit anti-ZAP polyclonal antibody (PA5-31650, Invitrogen) at 1:500. Alexa-fluor-647  
491 conjugated goat anti-mouse or Alexa-fluor-488 conjugated goat-anti-rabbit IgG secondary  
492 antibodies were diluted 1:1000. All images were acquired with Zeiss LSM 710 confocal  
493 microscope fitted with 63X/1.4 oil-immersion objective lens.

494

#### 495 **Real-Time PCR analysis**

496 Total RNA was isolated by using Trizol solution according to the manufacturer's protocol  
497 followed by DNase (Turbo DNA-free kit, Ambion) treatment, and then reverse transcribed with  
498 poly T primers using High Capacity cDNA Reverse Transcription Kit (Invitrogen). Real-Time  
499 PCR was carried out using by Taqman assays with pre-designed gene-specific primer/probe  
500 set (Applied Biosystems) on Rotor gene 3000 (Corbet Research). Custom primer/probe set  
501 are TCCTCTCTCAGGATCTGTATGT, GGAGAGGAAGGAGTCAAAGATG, and 56-FAM/  
502 ACCATCTAC/ZEN/CCATTGGCTCAAGCA/3IABkFQ for ZAP(L), and AGCATGGTGTGACT  
503 GAAAGG, CTTACAGCTGGAGAAGCTAAA, and 56-FAM/TCTGAAAGG/ZEN/GAAGTCTG  
504 AGCGAGTCT/3IABkFQ for ZAP(S).

505

#### 506 **Fluorescence-activated cell sorting (FACS)**

507 NHDFs were infected with GFP expressing TB40E virus at an MOI of three. 24 hours later,  
508 the cells were trypsinized, and resuspended in PBS buffer. The resuspended cells were then  
509 sorted into low GFP (parameter set using uninfected cells) or high GFP population by the BD  
510 FACSaria Illu cell sorter. Immediately after sorting, a small portion of the cells from each  
511 population were collected and lysed with RIPA buffer, and the remaining low GFP and high  
512 GFP cells were re-seeded into a 6-well plate respectively and incubated for another 24 to 72  
513 hours before lysed with RIPA buffer.

514

515

## 516 **Analysis of CpG dinucleotides frequency in Herpesvirus genome**

517 CpG dinucleotide frequencies were determined using the program Composition scan in the  
518 SSE Sequence editor v1.3 (PMID: 22264264). Results were expressed as ratios of observed  
519 frequencies (fCpG) to those predicted by the frequencies of their component mononucleotides  
520 (fC x fG). This ratio was normalised through computing constraints imposed by amino acid  
521 coding on dinucleotide frequencies. For example, a methionine codon enforces the presence  
522 of ApU and UpG dinucleotides, while glycine codons requires a GpG dinucleotide, as well as  
523 GpN, Corrected dinucleotide ratios are therefore based on observed to expected frequencies  
524 coding-enforced dinucleotides are excluded. All accession data is listed in supplemental table  
525 2.

## 527 **Acknowledgments**

528 This project was funded by the MRC (MR/N001796/1), the BBSRC (BBS/E/D/20002172) and  
529 through the Principal's Career Development PhD scholarship from the University of  
530 Edinburgh. We would like to acknowledge help and technical assistance from Robert Fleming  
531 and Graeme Robertson of the Roslin Bioimaging and flow cytometry facility.

## 533 **Competing interests**

534 There are no competing interests.

## 536 **References**

- 537
- 538 1 Ivashkiv, L. B. & Donlin, L. T. Regulation of type I interferon responses. *Nat Rev*  
539 *Immunol* **14**, 36-49, doi:10.1038/nri3581 (2014).
  - 540 2 Amsler, L., Verweij, M. & DeFilippis, V. R. The tiers and dimensions of evasion of the  
541 type I interferon response by human cytomegalovirus. *J Mol Biol* **425**, 4857-4871,  
542 doi:10.1016/j.jmb.2013.08.023 (2013).
  - 543 3 Kumar, H., Kawai, T. & Akira, S. Pathogen recognition by the innate immune system.  
544 *Int Rev Immunol* **30**, 16-34, doi:10.3109/08830185.2010.529976 (2011).
  - 545 4 Shaw, A. E. *et al.* Fundamental properties of the mammalian innate immune system  
546 revealed by multispecies comparison of type I interferon responses. *PLoS Biol* **15**,  
547 e2004086, doi:10.1371/journal.pbio.2004086 (2017).
  - 548 5 Atkinson, N. J., Witteveldt, J., Evans, D. J. & Simmonds, P. The influence of CpG and  
549 UpA dinucleotide frequencies on RNA virus replication and characterization of the  
550 innate cellular pathways underlying virus attenuation and enhanced replication. *Nucleic*  
551 *Acids Res* **42**, 4527-4545, doi:10.1093/nar/gku075 (2014).
  - 552 6 Karlin, S., Doerfler, W. & Cardon, L. R. Why is CpG suppressed in the genomes of  
553 virtually all small eukaryotic viruses but not in those of large eukaryotic viruses? *J Virol*  
554 **68**, 2889-2897 (1994).
  - 555 7 Rima, B. K. & McFerran, N. V. Dinucleotide and stop codon frequencies in single-  
556 stranded RNA viruses. *J Gen Virol* **78 ( Pt 11)**, 2859-2870, doi:10.1099/0022-1317-78-  
557 11-2859 (1997).

- 558 8 Simmonds, P., Xia, W., Baillie, J. K. & McKinnon, K. Modelling mutational and  
559 selection pressures on dinucleotides in eukaryotic phyla--selection against CpG and  
560 UpA in cytoplasmically expressed RNA and in RNA viruses. *BMC Genomics* **14**, 610,  
561 doi:10.1186/1471-2164-14-610 (2013).
- 562 9 Gaunt, E. *et al.* Elevation of CpG frequencies in influenza A genome attenuates  
563 pathogenicity but enhances host response to infection. *Elife* **5**, e12735,  
564 doi:10.7554/eLife.12735 (2016).
- 565 10 Coulondre, C., Miller, J. H., Farabaugh, P. J. & Gilbert, W. Molecular basis of base  
566 substitution hotspots in *Escherichia coli*. *Nature* **274**, 775-780, doi:10.1038/274775a0  
567 (1978).
- 568 11 Takata, M. A. *et al.* CG dinucleotide suppression enables antiviral defence targeting  
569 non-self RNA. *Nature* **550**, 124-127, doi:10.1038/nature24039 (2017).
- 570 12 Kerns, J. A., Emerman, M. & Malik, H. S. Positive selection and increased antiviral  
571 activity associated with the PARP-containing isoform of human zinc-finger antiviral  
572 protein. *PLoS Genet* **4**, e21, doi:10.1371/journal.pgen.0040021 (2008).
- 573 13 Gao, G., Guo, X. & Goff, S. P. Inhibition of retroviral RNA production by ZAP, a  
574 CCCH-type zinc finger protein. *Science* **297**, 1703-1706, doi:10.1126/science.1074276  
575 (2002).
- 576 14 Guo, X., Carroll, J. W., Macdonald, M. R., Goff, S. P. & Gao, G. The zinc finger  
577 antiviral protein directly binds to specific viral mRNAs through the CCCH zinc finger  
578 motifs. *J Virol* **78**, 12781-12787, doi:10.1128/JVI.78.23.12781-12787.2004 (2004).
- 579 15 Meagher, J. L. *et al.* Structure of the zinc-finger antiviral protein in complex with RNA  
580 reveals a mechanism for selective targeting of CG-rich viral sequences. *Proc Natl Acad*  
581 *Sci U S A* **116**, 24303-24309, doi:10.1073/pnas.1913232116 (2019).
- 582 16 Zou, W. & Zhang, D. E. The interferon-inducible ubiquitin-protein isopeptide ligase  
583 (E3) EFP also functions as an ISG15 E3 ligase. *J Biol Chem* **281**, 3989-3994,  
584 doi:10.1074/jbc.M510787200 (2006).
- 585 17 Khan, R., Khan, A., Ali, A. & Idrees, M. The interplay between viruses and TRIM  
586 family proteins. *Rev Med Virol* **29**, e2028, doi:10.1002/rmv.2028 (2019).
- 587 18 Li, M. M. *et al.* TRIM25 Enhances the Antiviral Action of Zinc-Finger Antiviral  
588 Protein (ZAP). *PLoS Pathog* **13**, e1006145, doi:10.1371/journal.ppat.1006145 (2017).
- 589 19 Zheng, X. *et al.* TRIM25 Is Required for the Antiviral Activity of Zinc Finger Antiviral  
590 Protein. *J Virol* **91**, doi:10.1128/JVI.00088-17 (2017).
- 591 20 Odon, V. *et al.* The role of ZAP and OAS3/RNaseL pathways in the attenuation of an  
592 RNA virus with elevated frequencies of CpG and UpA dinucleotides. *Nucleic Acids*  
593 *Res* **47**, 8061-8083, doi:10.1093/nar/gkz581 (2019).
- 594 21 Fields, B. N. K. D. M. H. P. M. *Fields virology*. (Wolters Kluwer Health/Lippincott  
595 Williams & Wilkins, 2013).
- 596 22 Kotton, C. N. CMV: Prevention, Diagnosis and Therapy. *Am J Transplant* **13 Suppl 3**,  
597 24-40; quiz 40, doi:10.1111/ajt.12006 (2013).
- 598 23 Kowalsky, S., Arnon, R. & Posada, R. Prevention of cytomegalovirus following solid  
599 organ transplantation: a literature review. *Pediatr Transplant* **17**, 499-509,  
600 doi:10.1111/petr.12118 (2013).
- 601 24 Bruminhent, J. & Razonable, R. R. Management of cytomegalovirus infection and  
602 disease in liver transplant recipients. *World journal of hepatology* **6**, 370-383,  
603 doi:10.4254/wjh.v6.i6.370 (2014).
- 604 25 Ballard, R. A., Drew, W. L., Hufnagle, K. G. & Riedel, P. A. Acquired cytomegalovirus  
605 infection in preterm infants. *Am J Dis Child* **133**, 482-485 (1979).



- 606 26 Griffith, D. M. *et al.* Systemic inflammation after critical illness: relationship with  
607 physical recovery and exploration of potential mechanisms. *Thorax* **71**, 820-829,  
608 doi:10.1136/thoraxjnl-2015-208114 (2016).
- 609 27 Jergovic, M., Contreras, N. A. & Nikolich-Zugich, J. Impact of CMV upon immune  
610 aging: facts and fiction. *Med Microbiol Immunol* **208**, 263-269, doi:10.1007/s00430-  
611 019-00605-w (2019).
- 612 28 Juckem, L. K., Boehme, K. W., Feire, A. L. & Compton, T. Differential initiation of  
613 innate immune responses induced by human cytomegalovirus entry into fibroblast cells.  
614 *J Immunol* **180**, 4965-4977, doi:10.4049/jimmunol.180.7.4965 (2008).
- 615 29 Paijo, J. *et al.* cGAS Senses Human Cytomegalovirus and Induces Type I Interferon  
616 Responses in Human Monocyte-Derived Cells. *PLoS Pathog* **12**, e1005546,  
617 doi:10.1371/journal.ppat.1005546 (2016).
- 618 30 Lio, C. W. *et al.* cGAS-STING Signaling Regulates Initial Innate Control of  
619 Cytomegalovirus Infection. *J Virol* **90**, 7789-7797, doi:10.1128/JVI.01040-16 (2016).
- 620 31 Diner, B. A., Lum, K. K., Toettcher, J. E. & Cristea, I. M. Viral DNA Sensors IFI16  
621 and Cyclic GMP-AMP Synthase Possess Distinct Functions in Regulating Viral Gene  
622 Expression, Immune Defenses, and Apoptotic Responses during Herpesvirus Infection.  
623 *MBio* **7**, doi:10.1128/mBio.01553-16 (2016).
- 624 32 DeFilippis, V. R., Alvarado, D., Sali, T., Rothenburg, S. & Fruh, K. Human  
625 cytomegalovirus induces the interferon response via the DNA sensor ZBP1. *J Virol* **84**,  
626 585-598, doi:10.1128/JVI.01748-09 (2010).
- 627 33 Browne, E. P., Wing, B., Coleman, D. & Shenk, T. Altered cellular mRNA levels in  
628 human cytomegalovirus-infected fibroblasts: viral block to the accumulation of  
629 antiviral mRNAs. *J Virol* **75**, 12319-12330, doi:10.1128/JVI.75.24.12319-12330.2001  
630 (2001).
- 631 34 DeFilippis, V. R. *et al.* Interferon regulatory factor 3 is necessary for induction of  
632 antiviral genes during human cytomegalovirus infection. *J Virol* **80**, 1032-1037,  
633 doi:10.1128/JVI.80.2.1032-1037.2006 (2006).
- 634 35 Yurochko, A. D., Kowalik, T. F., Huong, S. M. & Huang, E. S. Human cytomegalovirus  
635 upregulates NF-kappa B activity by transactivating the NF-kappa B p105/p50 and p65  
636 promoters. *J Virol* **69**, 5391-5400 (1995).
- 637 36 Taylor, R. T. & Bresnahan, W. A. Human cytomegalovirus immediate-early 2 gene  
638 expression blocks virus-induced beta interferon production. *J Virol* **79**, 3873-3877,  
639 doi:10.1128/JVI.79.6.3873-3877.2005 (2005).
- 640 37 Paulus, C., Krauss, S. & Nevels, M. A human cytomegalovirus antagonist of type I  
641 IFN-dependent signal transducer and activator of transcription signaling. *Proc Natl*  
642 *Acad Sci U S A* **103**, 3840-3845, doi:10.1073/pnas.0600007103 (2006).
- 643 38 Feng, J. *et al.* Interferon-Stimulated Gene (ISG)-Expression Screening Reveals the  
644 Specific Antibunyaviral Activity of ISG20. *J Virol* **92**, doi:10.1128/JVI.02140-17  
645 (2018).
- 646 39 Rihn, S. J. *et al.* TRIM69 Inhibits Vesicular Stomatitis Indiana Virus. *J Virol* **93**,  
647 doi:10.1128/JVI.00951-19 (2019).
- 648 40 Dittmann, M. *et al.* A serpin shapes the extracellular environment to prevent influenza  
649 A virus maturation. *Cell* **160**, 631-643, doi:10.1016/j.cell.2015.01.040 (2015).
- 650 41 Kane, M. *et al.* Identification of Interferon-Stimulated Genes with Antiretroviral  
651 Activity. *Cell host & microbe* **20**, 392-405, doi:10.1016/j.chom.2016.08.005 (2016).
- 652 42 Schoggins, J. W. *et al.* A diverse range of gene products are effectors of the type I  
653 interferon antiviral response. *Nature* **472**, 481-485, doi:10.1038/nature09907 (2011).

- 654 43 Umashankar, M. *et al.* A novel human cytomegalovirus locus modulates cell type-  
655 specific outcomes of infection. *PLoS Pathog* **7**, e1002444,  
656 doi:10.1371/journal.ppat.1002444 (2011).
- 657 44 Sali, T. M. *et al.* Characterization of a Novel Human-Specific STING Agonist that  
658 Elicits Antiviral Activity Against Emerging Alphaviruses. *PLoS Pathog* **11**, e1005324,  
659 doi:10.1371/journal.ppat.1005324 (2015).
- 660 45 Kapoor, A., Forman, M. & Arav-Boger, R. Activation of nucleotide oligomerization  
661 domain 2 (NOD2) by human cytomegalovirus initiates innate immune responses and  
662 restricts virus replication. *PLoS One* **9**, e92704, doi:10.1371/journal.pone.0092704  
663 (2014).
- 664 46 Zimmermann, A. *et al.* Checks and balances between human cytomegalovirus  
665 replication and indoleamine-2,3-dioxygenase. *J Gen Virol* **95**, 659-670,  
666 doi:10.1099/vir.0.061994-0 (2014).
- 667 47 Bick, M. J. *et al.* Expression of the zinc-finger antiviral protein inhibits alphavirus  
668 replication. *J Virol* **77**, 11555-11562, doi:10.1128/jvi.77.21.11555-11562.2003 (2003).
- 669 48 Chiu, H. P. *et al.* Inhibition of Japanese encephalitis virus infection by the host zinc-  
670 finger antiviral protein. *PLoS Pathog* **14**, e1007166, doi:10.1371/journal.ppat.1007166  
671 (2018).
- 672 49 Liu, C. H., Zhou, L., Chen, G. & Krug, R. M. Battle between influenza A virus and a  
673 newly identified antiviral activity of the PARP-containing ZAPL protein. *Proc Natl*  
674 *Acad Sci U S A* **112**, 14048-14053, doi:10.1073/pnas.1509745112 (2015).
- 675 50 Muller, S. *et al.* Inhibition of filovirus replication by the zinc finger antiviral protein. *J*  
676 *Virol* **81**, 2391-2400, doi:10.1128/JVI.01601-06 (2007).
- 677 51 Zhu, Y. *et al.* Zinc-finger antiviral protein inhibits HIV-1 infection by selectively  
678 targeting multiply spliced viral mRNAs for degradation. *Proc Natl Acad Sci U S A* **108**,  
679 15834-15839, doi:10.1073/pnas.1101676108 (2011).
- 680 52 Honess, R. W. *et al.* Deviations from expected frequencies of CpG dinucleotides in  
681 herpesvirus DNAs may be diagnostic of differences in the states of their latent genomes.  
682 *J Gen Virol* **70 ( Pt 4)**, 837-855, doi:10.1099/0022-1317-70-4-837 (1989).
- 683 53 Mao, R. *et al.* Inhibition of hepatitis B virus replication by the host zinc finger antiviral  
684 protein. *PLoS Pathog* **9**, e1003494, doi:10.1371/journal.ppat.1003494 (2013).
- 685 54 Hayakawa, S. *et al.* ZAPS is a potent stimulator of signaling mediated by the RNA  
686 helicase RIG-I during antiviral responses. *Nat Immunol* **12**, 37-44, doi:10.1038/ni.1963  
687 (2011).
- 688 55 Li, M. *et al.* Zinc finger antiviral protein inhibits coxsackievirus B3 virus replication  
689 and protects against viral myocarditis. *Antiviral Res* **123**, 50-61,  
690 doi:10.1016/j.antiviral.2015.09.001 (2015).
- 691 56 Guo, X., Ma, J., Sun, J. & Gao, G. The zinc-finger antiviral protein recruits the RNA  
692 processing exosome to degrade the target mRNA. *Proc Natl Acad Sci U S A* **104**, 151-  
693 156, doi:10.1073/pnas.0607063104 (2007).
- 694 57 Meagher, J. L. *et al.* Structure of the zinc-finger antiviral protein in complex with RNA  
695 reveals a mechanism for selective targeting of CG-rich viral sequences. *Proc Natl Acad*  
696 *Sci U S A*, doi:10.1073/pnas.1913232116 (2019).
- 697 58 Fields, B. N., Knipe, D. M. & Howley, P. M. *Fields' virology*. 5th ed. / editors-in-chief,  
698 David M. Knipe, Peter M. Howley ; associate editors, Diane E. Griffin ... [et al.]. edn,  
699 (Wolters Kluwer/Lippincott Williams & Wilkins, 2007).
- 700 59 Choudhury, N. R. *et al.* RNA-binding activity of TRIM25 is mediated by its  
701 PRY/SPRY domain and is required for ubiquitination. *BMC Biol* **15**, 105,  
702 doi:10.1186/s12915-017-0444-9 (2017).

- 703 60 Meyerson, N. R. *et al.* Nuclear TRIM25 Specifically Targets Influenza Virus  
704 Ribonucleoproteins to Block the Onset of RNA Chain Elongation. *Cell Host Microbe*  
705 **22**, 627-638 e627, doi:10.1016/j.chom.2017.10.003 (2017).  
706 61 Li, M. M. H. *et al.* Characterization of Novel Splice Variants of Zinc Finger Antiviral  
707 Protein (ZAP). *J Virol* **93**, doi:10.1128/JVI.00715-19 (2019).  
708 62 Choudhury, N. R. *et al.* Trim25 Is an RNA-Specific Activator of Lin28a/TuT4-  
709 Mediated Uridylation. *Cell Rep* **9**, 1265-1272, doi:10.1016/j.celrep.2014.10.017  
710 (2014).  
711

**Figure 1**

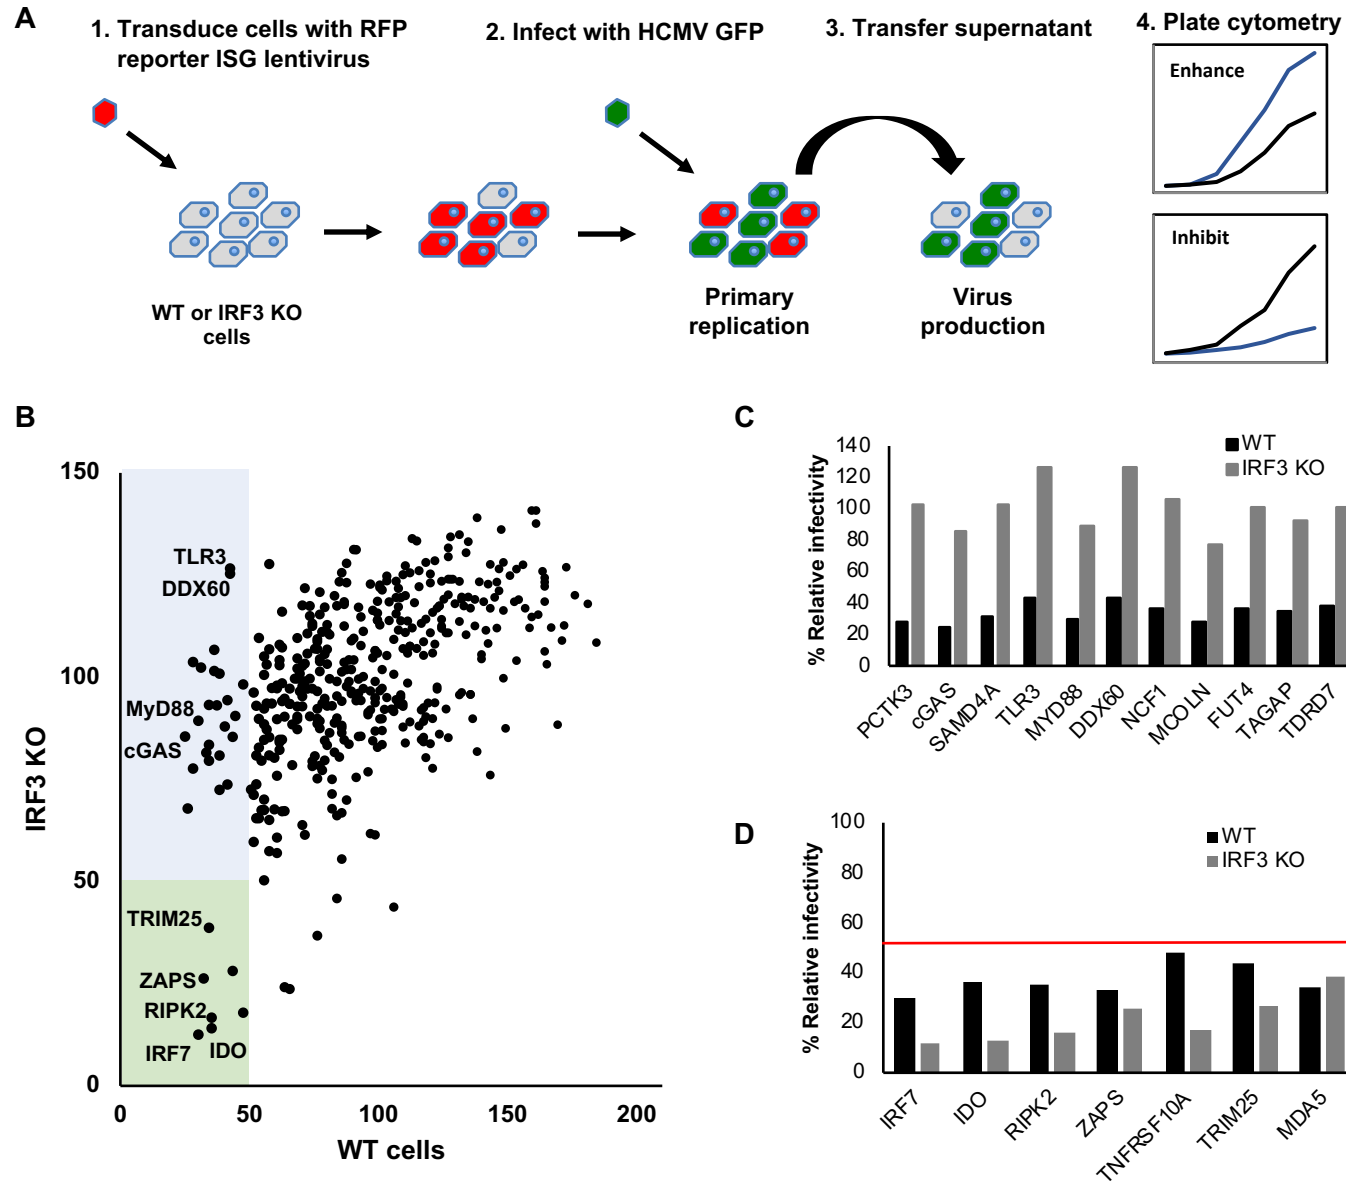

**Figure 1. Arrayed ISG expression screening identified ZAPS and TRIM25 as direct inhibitors of HCMV replication.** (A) Wild type and IRF3 KO fibroblast cells were seeded in 96-well plates and transduced with arrayed ISG lentivirus library. Cells were infected at 48 hours post-transduction with TB40/E-GFP (MOI of 3). GFP levels were monitored over a seven-day period to measure primary replication. Seven-days post infection supernatant was transferred to untransduced cells to measure virus production (B) Direct comparison of relative HCMV virus production for each individual ISG between wild type and IRF3 KO fibroblast cells. Blue box = ISGs that reduced virus production by more than 2-fold in wild type cells, but not in IRF3 KO cells. The green box = ISGs that reduced virus production by more than 2-fold in both wild type and IRF3 KO cells. Relative primary replication and virus production levels of HCMV for the ISGs in the blue box (C) and green box (D) are shown.

**Figure 2**

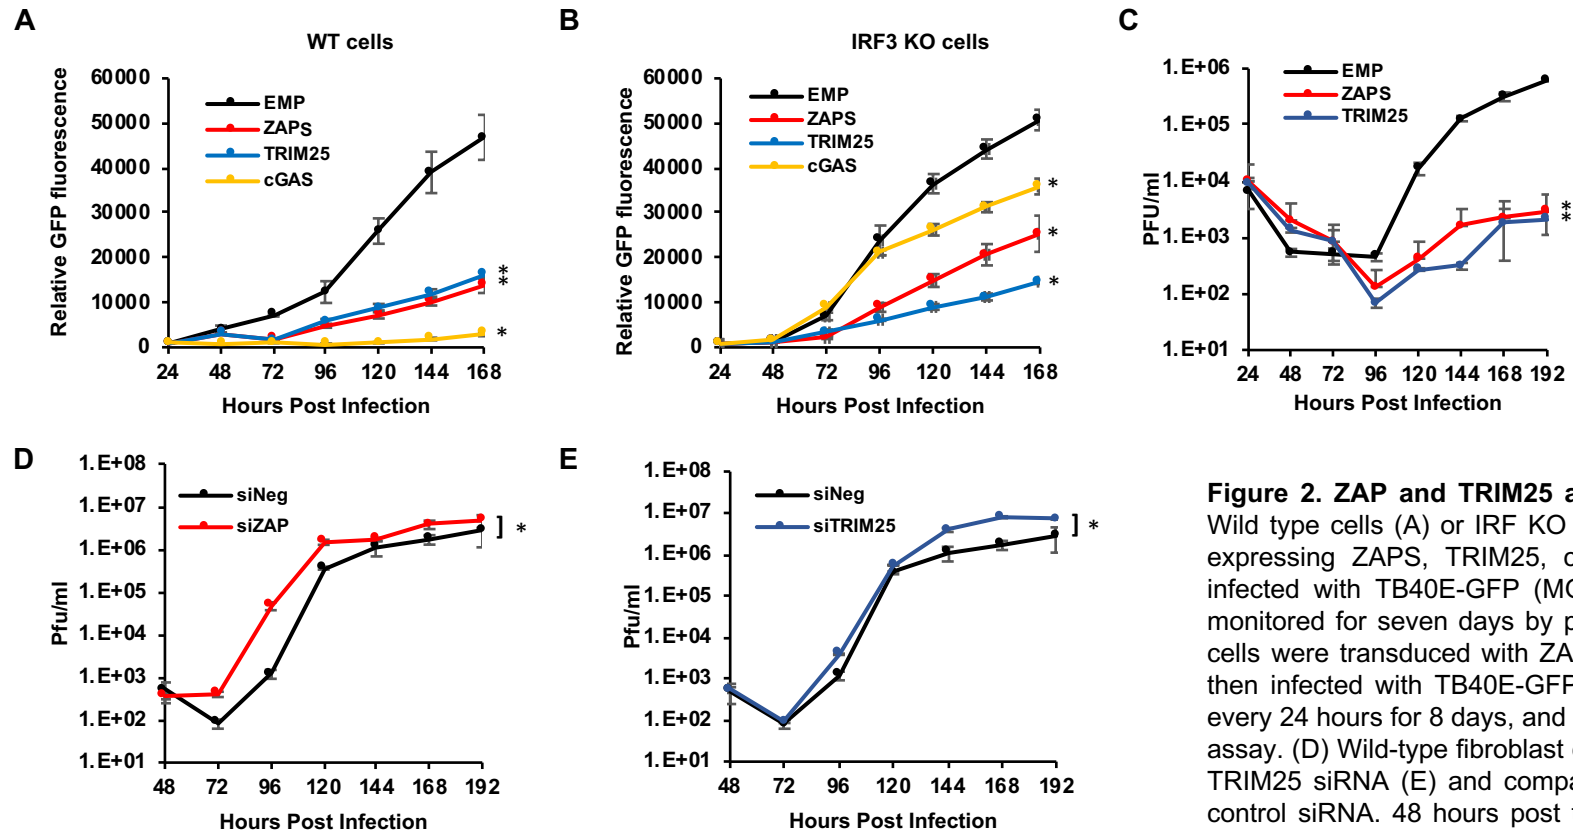

**Figure 2. ZAP and TRIM25 are host restriction factors for HCMV.** Wild type cells (A) or IRF KO cells (B) were transduced with lentivirus expressing ZAPS, TRIM25, cGAS or an empty control vector, and infected with TB40E-GFP (MOI of 3). GFP fluorescence levels were monitored for seven days by plate fluorometry. (C) Wild-type fibroblast cells were transduced with ZAPS, TRIM25 or an empty vector control, then infected with TB40E-GFP (MOI of 3). Supernatant was collected every 24 hours for 8 days, and the viral titres were determined by plaque assay. (D) Wild-type fibroblast cells were transfected with ZAP siRNA or TRIM25 siRNA (E) and compared to cells transfected with a negative control siRNA. 48 hours post transfection, the cells were infected with TB40E-GFP (MOI of 3). Supernatant was collected and virus titres determined by plaque assay. N = 2. \* p-value < 0.05 based on two-way ANOVA.

Figure 3

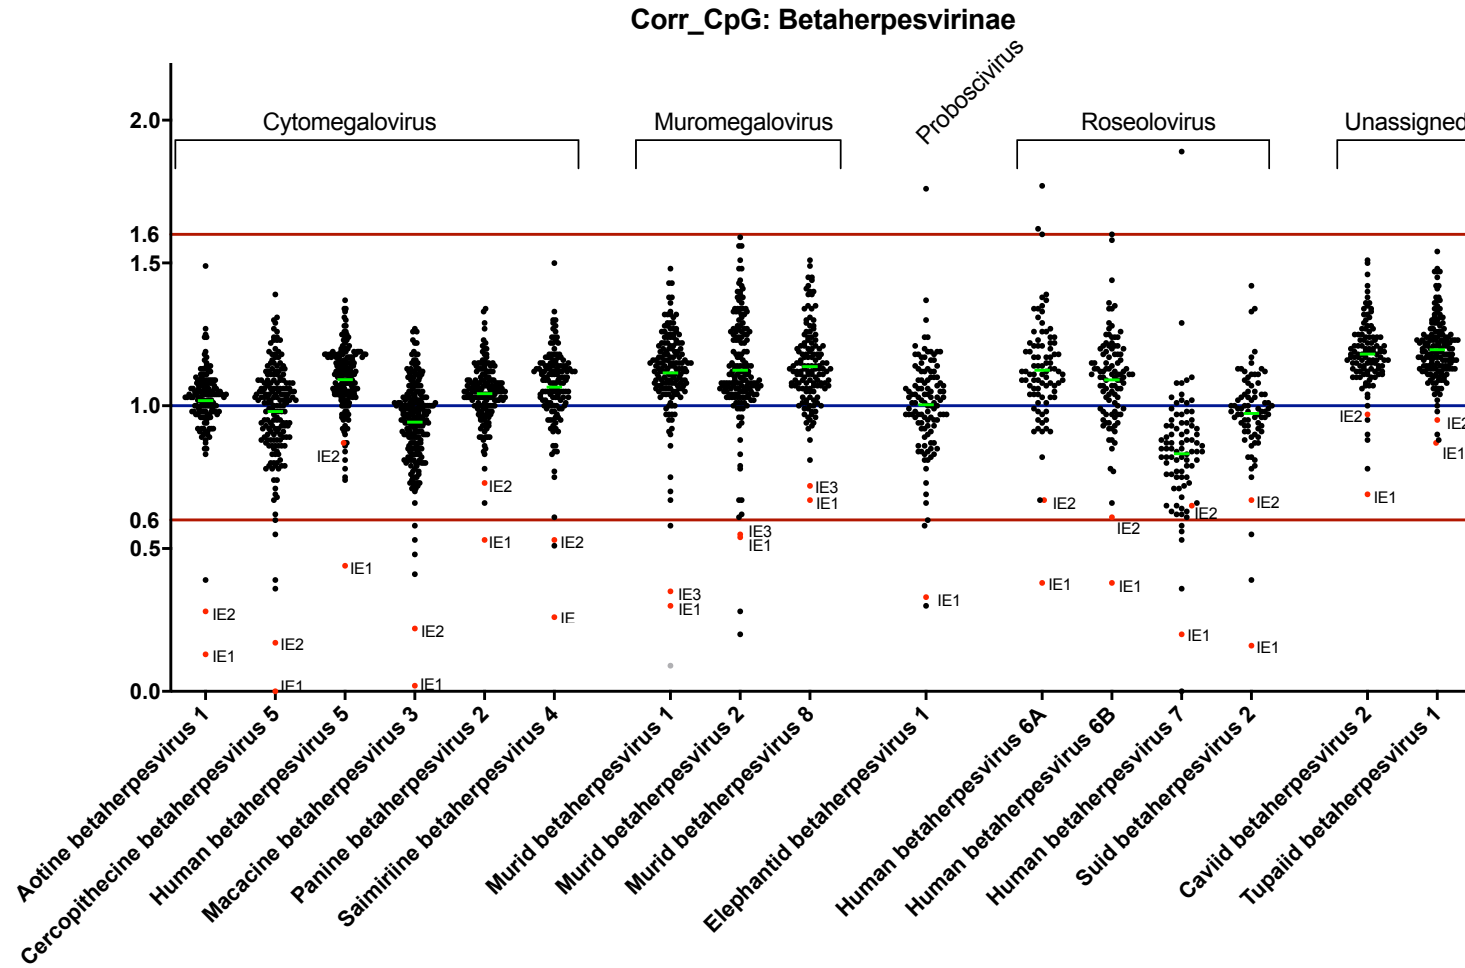

**Figure 3. Specific suppression of CpG nucleotides within the immediate early genes of beta-herpesviruses.** The CpG content of annotated open reading frames from 16 beta-herpesvirus genomes are shown, following normalization for length and GC content. A corrected CpG ratio of one reflects the expected number of CpGs based on GC content of a transcript.

**Figure 4**

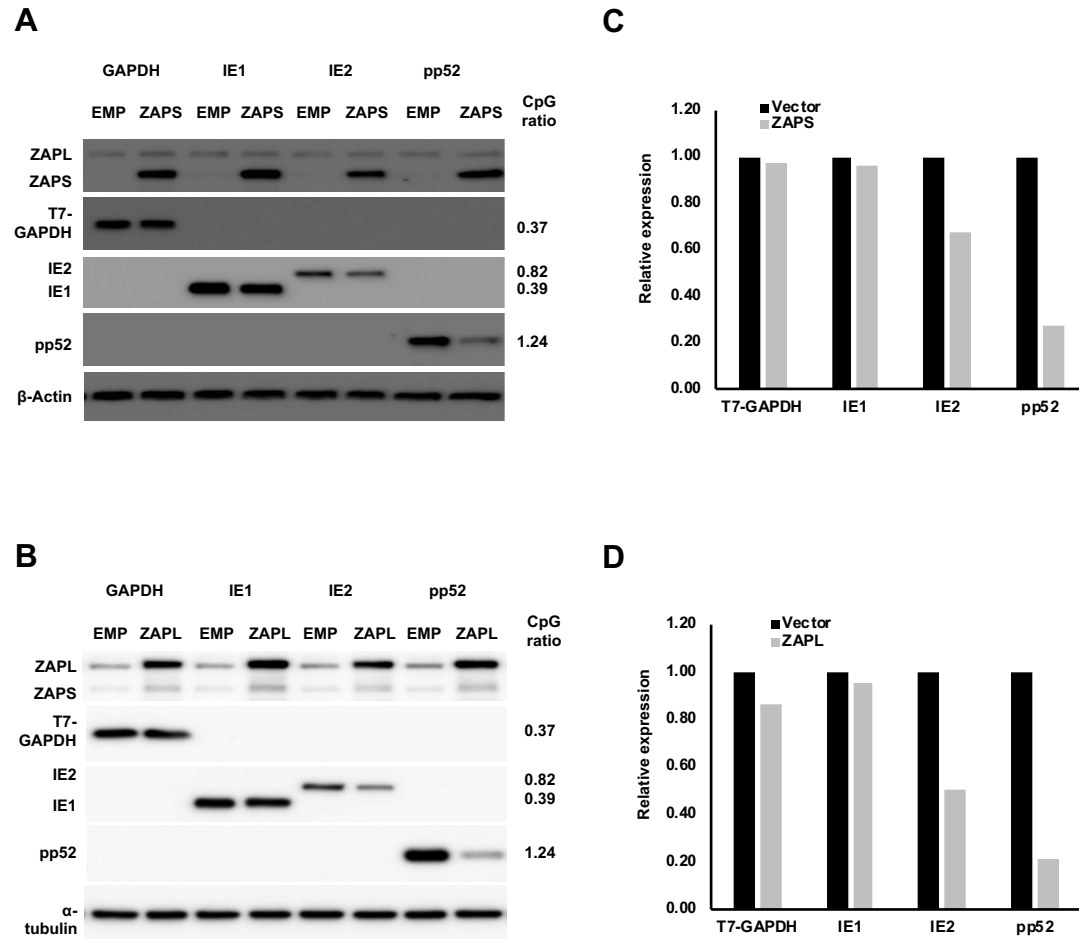

**Figure 4. ZAP targets HCMV genes with high CpG dinucleotide frequencies.** (A) 293T cells were co-transfected with plasmids expressing ZAPS (A), ZAPL (B) or a control empty vector with plasmids expressing HCMV genes with varied CpG dinucleotide frequencies (IE1, IE2 and pp52). A plasmid expressing T7-tagged GAPDH was included as a control with low CpG sequence content. CpG frequencies are indicated beside each gel. Expression levels of HCMV genes and T7-GAPDH were determined by western blot analysis. Expression levels for proteins co-expressed with ZAPS (C) and ZAPL (D) were quantified using Image J software and normalized to the empty construct control samples.

**Figure 5**

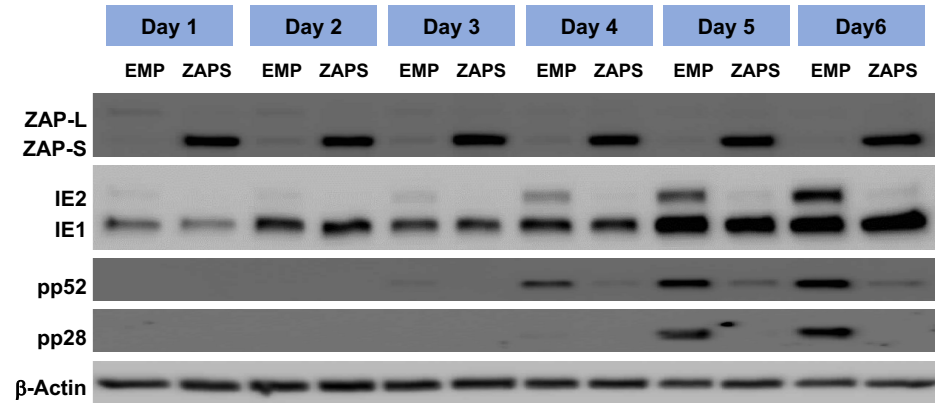

**Figure 5. IE1 expression is not affected by ZAP.** Wild type fibroblast cells were transduced with ZAPS or empty vector control lentiviruses and then infected with TB40E-GFP 48 hours post transduction. Total protein lysates were harvested every 24 hours and the expression levels of the viral proteins of each major kinetic class of HCMV were determined by western blot analysis. The result demonstrates that ZAPS overexpression leads to significant reduction of IE2 expression and downstream early and late viral proteins, whereas IE1 expression remains unaffected.



Figure 6

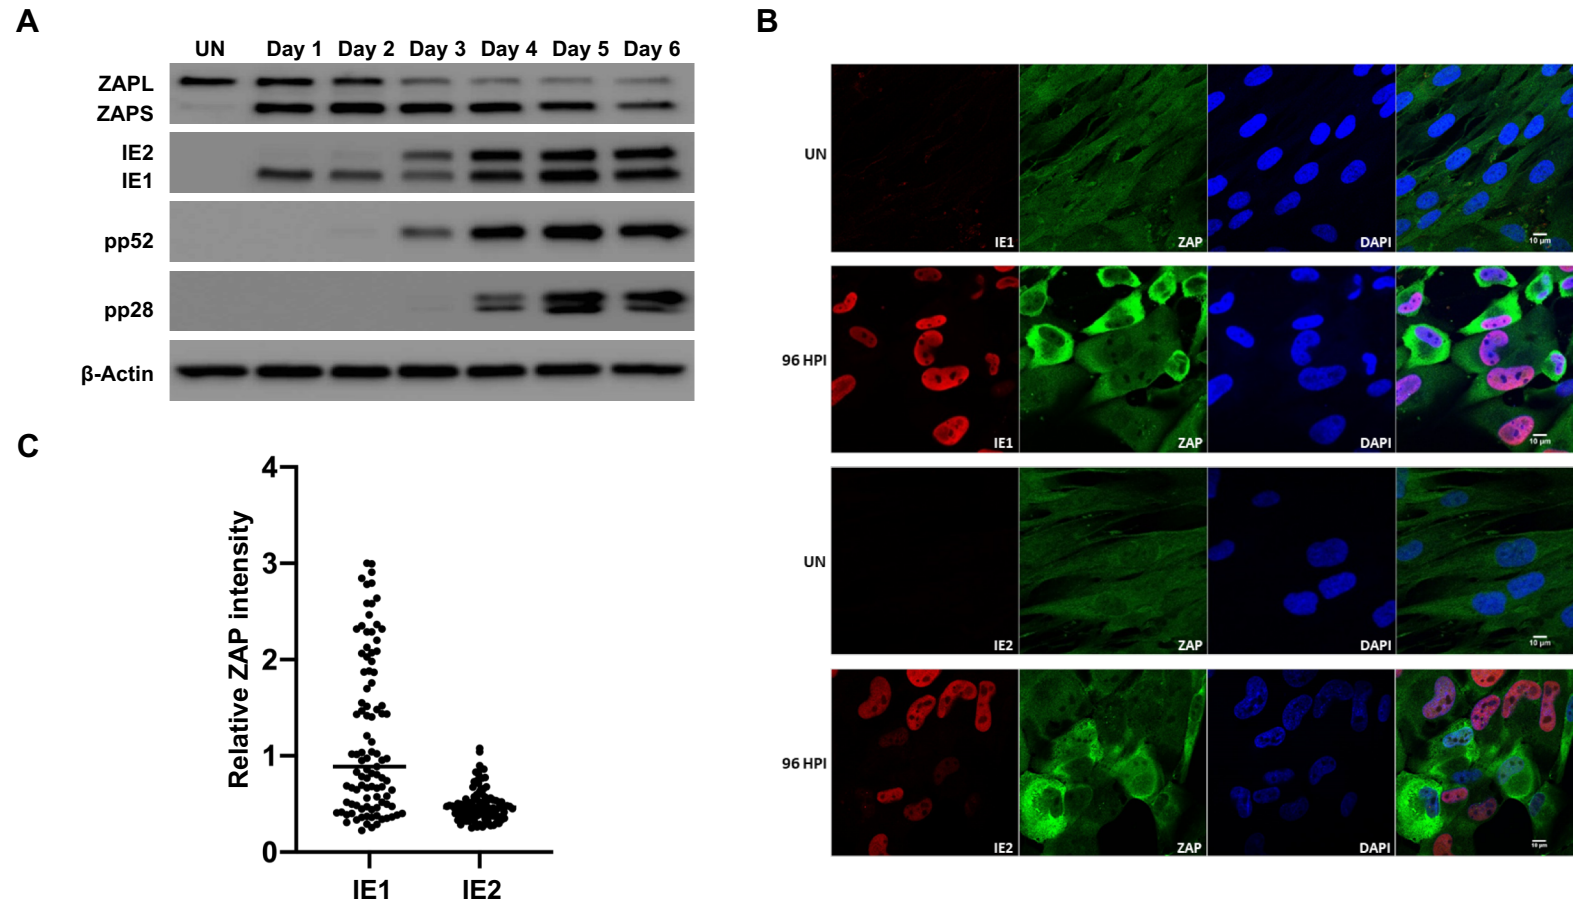

**Figure 6. ZAP expression is reduced in IE2 positive cells.** (A) Wild type fibroblast cells were infected with TB40E-GFP at an MOI of 3. Total protein lysates were harvested every 24 hours and the expression levels of ZAP and the viral proteins of each major kinetic class of HCMV were determined by western blot analysis. It demonstrates that ZAPS expression was robustly induced 24 hours post infection and remained higher than in uninfected cells throughout the course of the infection. (B) Wild type fibroblast cells were infected with HCMV 96 hours post infection, cells were fixed and stained with ZAP along with either IE1 or IE2. ZAP expression levels in IE1 or IE2 expressing cells were determined by confocal microscopy. Nuclei are stained with DAPI. (C) ZAP expression levels in 100 IE1-expressing cells and 100 IE2-expressing cells at 96 HPI were quantified and normalized to ZAP expression levels in uninfected cells from the confocal images using ZEN blue software.

**Figure 7**

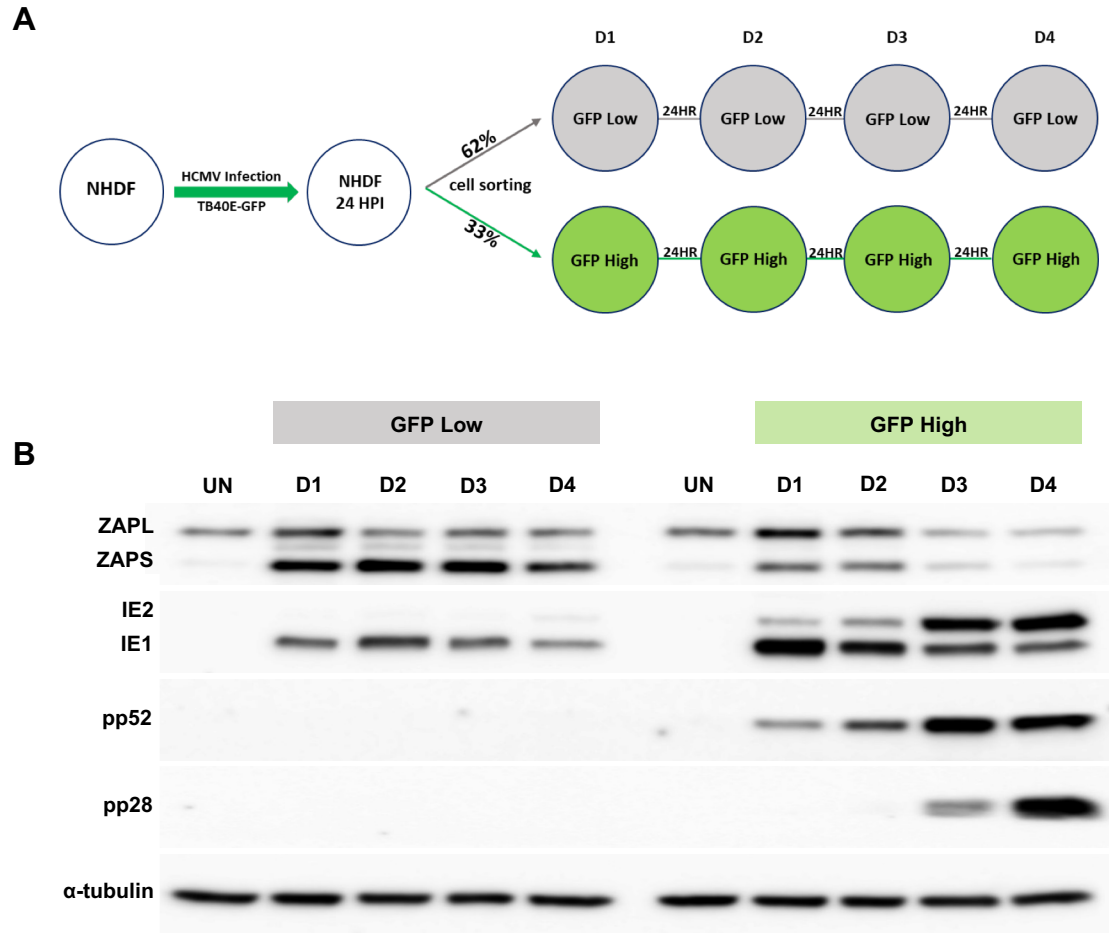

**Figure 7. High ZAP expression correlates with failure in HCMV acute replication.** (A) Diagram of cell sorting following TB40E-GFP infection. 24 hours post infection, fibroblast cells were sorted into low and high GFP expressing populations, and then re-seeded. Total protein lysates were harvested at the indicated time points. (B) Western blot analysis shows that the low GFP expressing population correlated with high levels of ZAPS expression and a failure in progression of virus replication, although IE1 expression can still be detected. In contrast, the high GFP expressing population correlated with low ZAPS expression and high levels of viral protein production, consistent with successful virus replication.

**Figure 8**

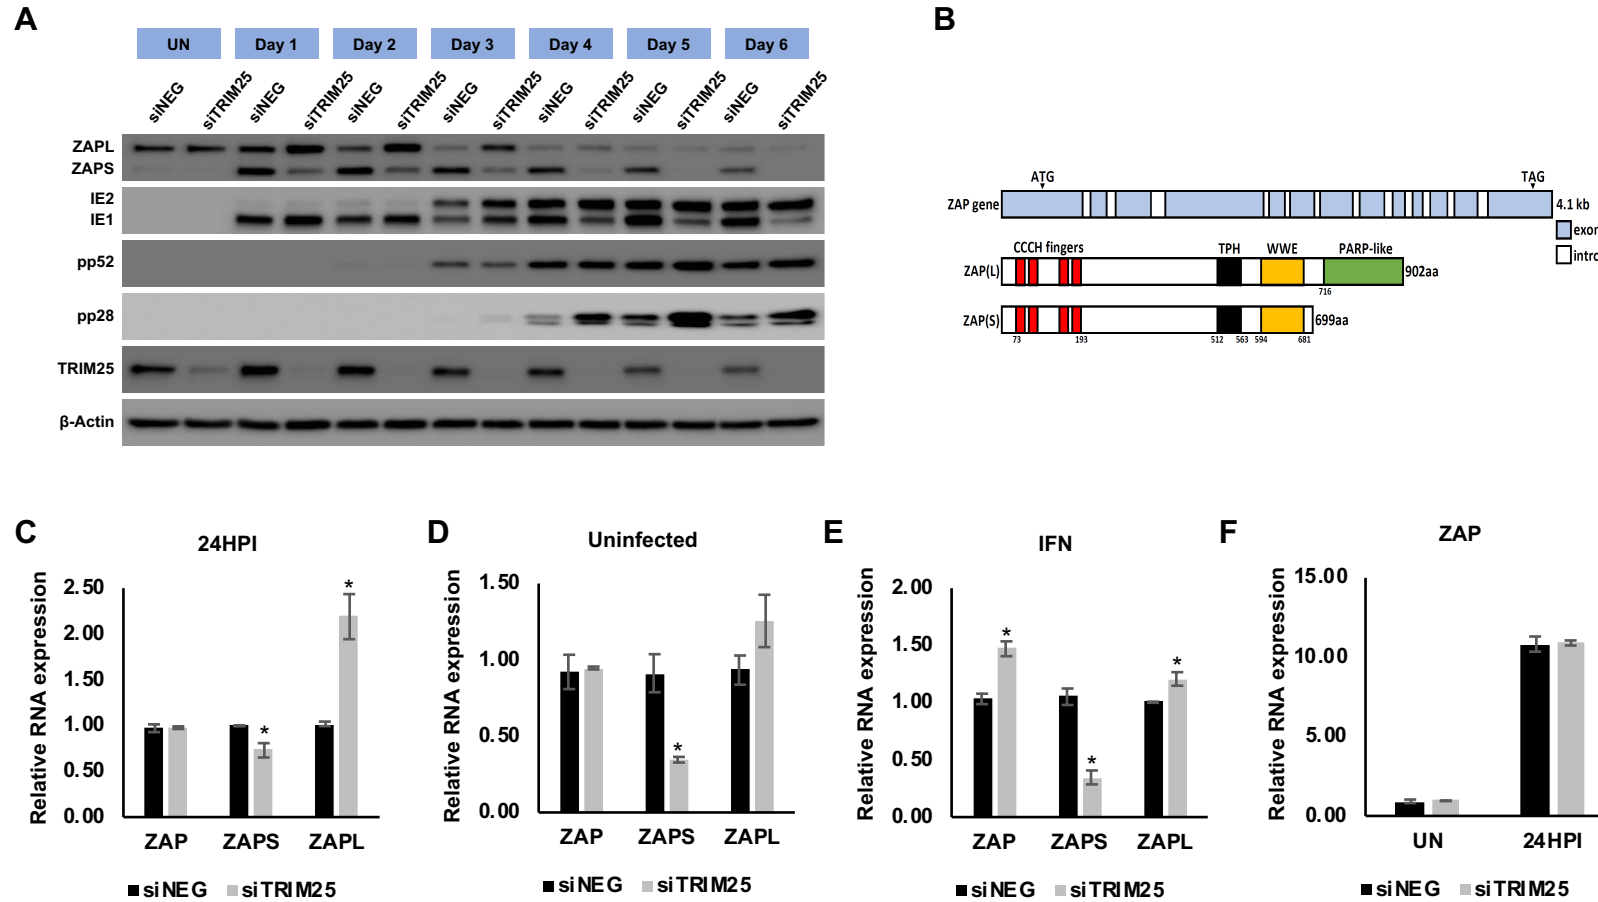

**Figure 8. TRIM25 regulates differential splicing of ZAP.** (A) Wildtype fibroblast cells were transfected with TRIM25 siRNA or negative control siRNA and infected with TB40/E-GFP 48 hours post transfection (MOI of 3). Total protein lysates were harvested every 24 hours and expression levels of ZAPS and ZAPL and viral proteins were determined by western blot analysis. The result demonstrates that knockdown of TRIM25 leads to substantial reductions in ZAPS expression and corresponding increase in ZAPL expression. (B) Diagram of the genomic structure of human ZAP gene showing the two major isoforms, ZAPS and ZAPL. Wildtype fibroblast cells were transfected with TRIM25 siRNA or negative control siRNA and infected with TB40E-GFP at an MOI of 3 (C), mock infected (D) or treated with IFN- $\alpha$  (E), 48 hours post transfection. Total RNA was harvested 24 hours later and primers specific to ZAPS, ZAPL or a shared exon were used to determine transcript levels by quantitative RT-qPCR analysis. Levels were normalised to GAPDH and compared to RNA levels from cells transfected with the control siRNA. (F) Levels of ZAP were compared between uninfected and infected cells showing no impact of TRIM25 knockdown on ZAP induction. N=2, \* p-value < 0.05 based on student T test.
